# Supplementary material for: Improving the stability and selectivity for the oxygen-evolution reaction on semiconducting WO3 photoelectrodes with a solid-state FeOOH catalyst
Source: Royal Society of Chemistry journal article supplement (doi:10.1039/c5ta04747a), 2015-08-28
Supplement: c5ta04747a2.pdf [file c5ta04747a2.pdf]

## Electronic Supplementary Information for

# Improving the Stability and Selectivity for the Oxygen-Evolution Reaction on Semiconducting WO<sub>3</sub> Photoelectrodes with a Solid-State FeOOH Catalyst

Charles R. Lhermitte,<sup>a</sup> J. Garret Verwer<sup>a</sup> and Bart M. Bartlett<sup>a\*</sup>

Department of Chemistry, University of Michigan, 930 N. University Avenue, Ann Arbor, MI 48109-1055, United States

Email: bartmb@umich.edu

### Table of Contents

|                                                                                                              |    |
|--------------------------------------------------------------------------------------------------------------|----|
| Fig. S1. Powder XRD pattern of WO <sub>3</sub> and WO <sub>3</sub> -FeOOH                                    | S2 |
| Fig. S2. CL-LSV of WO <sub>3</sub> after soaking in pH 4 and 7 KPi                                           | S2 |
| Fig. S3. SEM image of a cracked FeOOH                                                                        | S3 |
| Fig. S4. Powder XRD pattern of FeOOH grown on and FTO substrate                                              | S3 |
| Fig. S5. EDX spectrum of a WO <sub>3</sub> -FeOOH electrode                                                  | S4 |
| Fig. S6. F(R) spectrum for FeOOH Grown on FTO                                                                | S4 |
| Fig. S7. CL-LSV of FeOOH grown on an FTO substrate                                                           | S4 |
| Fig. S8. CL-LSVs of WO <sub>3</sub> -FeOOH and WO <sub>3</sub> under front and back illumination             | S5 |
| Fig. S9. O <sub>2</sub> measurements under illumination for three WO <sub>3</sub> -FeOOH electrodes          | S5 |
| Fig. S10. O <sub>2</sub> measurements under illumination for three WO <sub>3</sub> electrodes                | S6 |
| Fig. S11. CL-LSVs of WO <sub>3</sub> -FeOOH before/after soaking in pH4 and pH 7 KPi solutions               | S6 |
| Fig. S12. EQE at different light chopping frequencies for WO <sub>3</sub> and WO <sub>3</sub> -FeOOH         | S6 |
| Fig. S13. Cross-sectional and top-down SEM images of a WO <sub>3</sub> -FeOOH electrode                      | S7 |
| Fig. S14. Electrochemical H <sub>2</sub> O <sub>2</sub> detection on a WO <sub>3</sub> electrode             | S7 |
| Fig. S15. Electrochemical measurement of the surface area of WO <sub>3</sub> and WO <sub>3</sub> -FeOOH film | S8 |
| Fig. S16. (EQE WO <sub>3</sub> -FeOOH) / (EQE WO <sub>3</sub> ) ratio                                        | S8 |

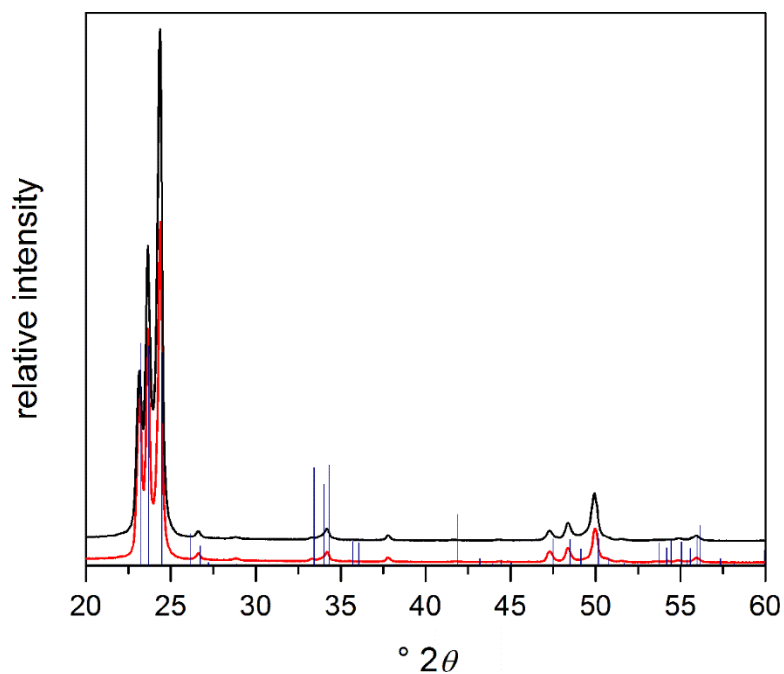

Fig. S1. Powder XRD pattern of  $\text{WO}_3$  (black) and  $\text{WO}_3\text{-FeOOH}$  (red). Blue vertical lines represent indexed Bragg reflections for monoclinic  $\text{WO}_3$ .

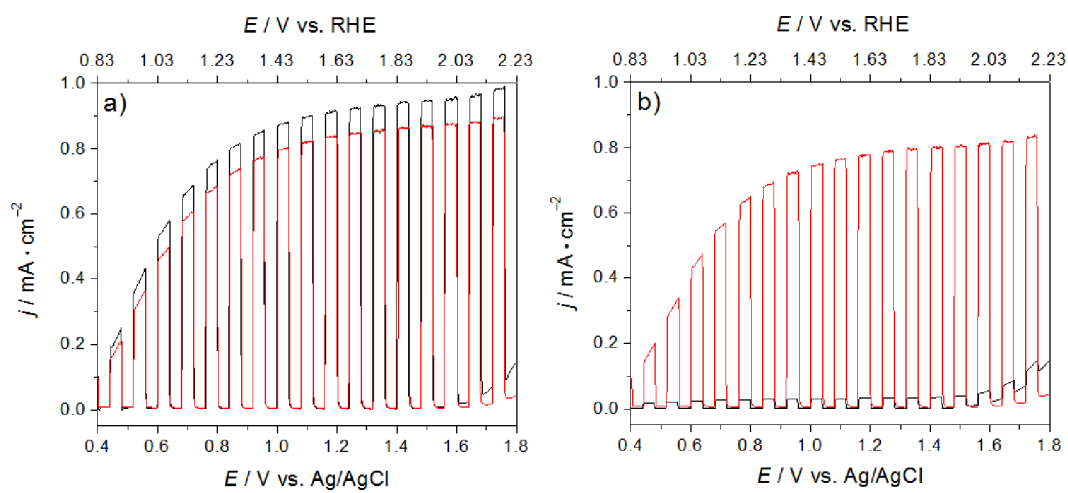

Fig. S2. CL-LSVs of  $\text{WO}_3$  recorded before (red) and after (black) soaking 0.1 M  $\text{KP}_i$  buffer at a) pH 4; and b) pH 7.

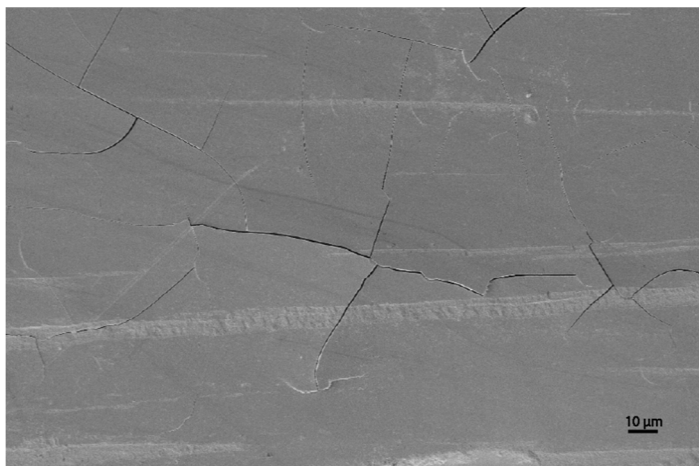

Fig. S3. SEM image of a cracked FeOOH on WO<sub>3</sub>. The pictured film was synthesized using longer deposition times, generating a thicker layer. Cracking in the film was observed due to the film drying out.

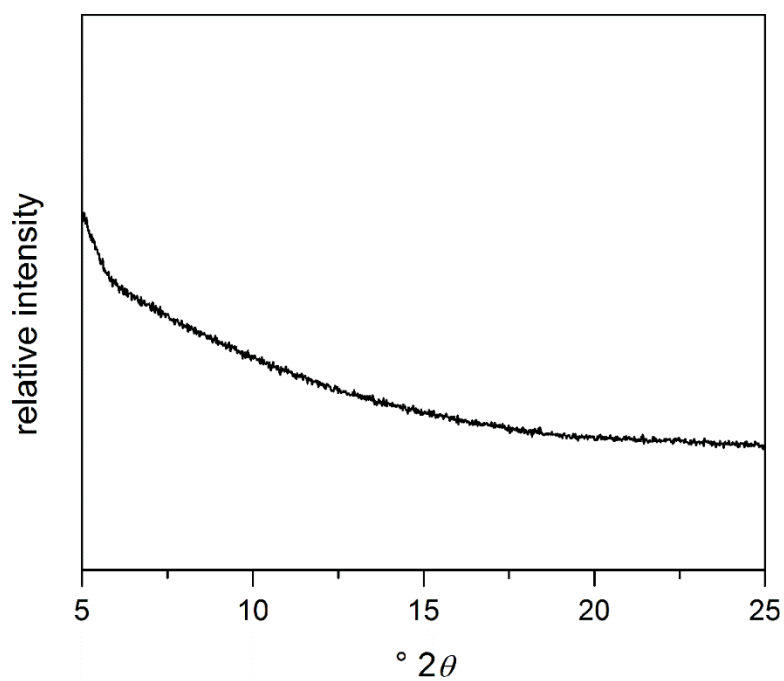

Fig. S4. Powder XRD pattern of FeOOH electrochemically deposited onto FTO showing no discernible Bragg reflections due to the amorphous nature of the film.

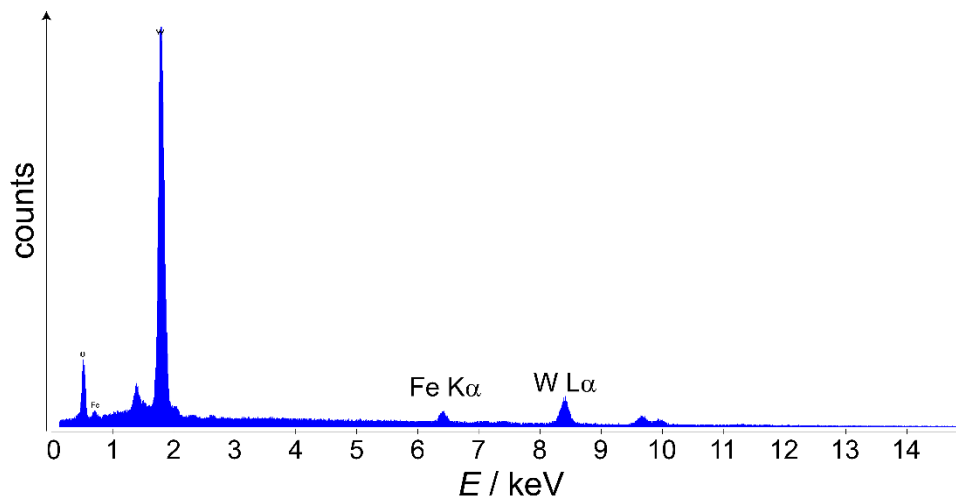

Fig. S5. EDX spectrum of a  $\text{WO}_3\text{-FeOOH}$  electrode.

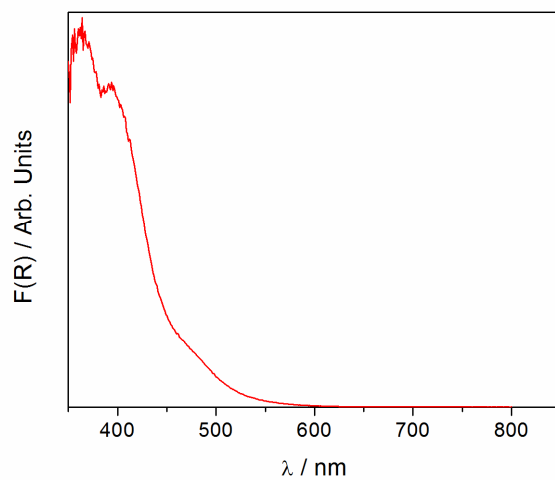

Fig. S6. F(R) spectrum for FeOOH electrochemically grown onto FTO.

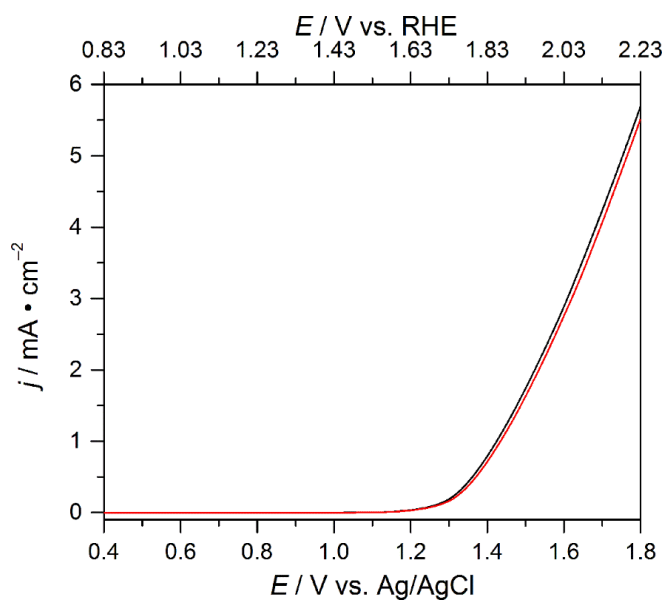

Fig. S7. LSV traces of FeOOH recorded in the dark (red) and under chopped light illumination (black).

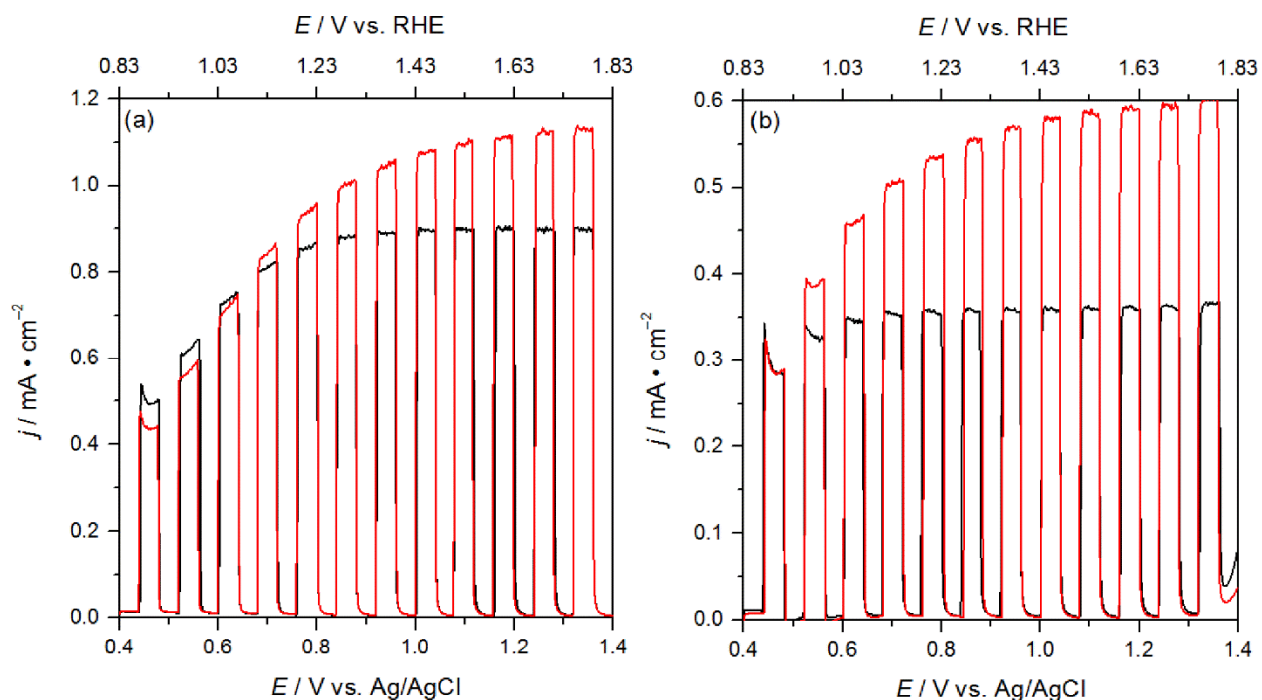

Fig. S8. CL-LSVs for a)  $\text{WO}_3$  and b)  $\text{FeOOH}$  recorded in 0.1 M  $\text{KP}_i$  buffer at pH 4 under  $100 \text{ mW/cm}^2$  AM1.5G illumination. The sweep rate is 20 mV/s. Data in black represent voltammograms recorded under front-side illumination, and data in red under back-side illumination.

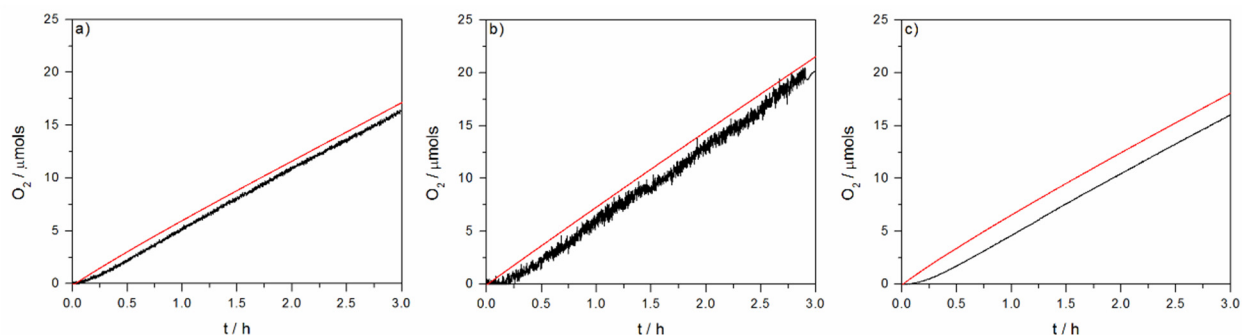

Fig. S9. Three trials of oxygen-evolution Faradaic efficiency measurements on  $\text{WO}_3\text{-FeOOH}$  recorded at 1.43 V vs. RHE in 0.1 M  $\text{KP}_i$  buffer at pH 4 under  $200 \text{ mW/cm}^2$  AM1.5G illumination. The red lines represent the theoretical yield of  $\text{O}_2$  based on the charge passed, and the black lines indicate the  $\text{O}_2$  measured by the Neofix  $\text{O}_2$  fluorescence probe. For each experiment, a fresh  $\text{WO}_3\text{-FeOOH}$  electrode was employed. From left to right, the Faradaic efficiencies are 95.6, 97.7, and 94.5% respectively.

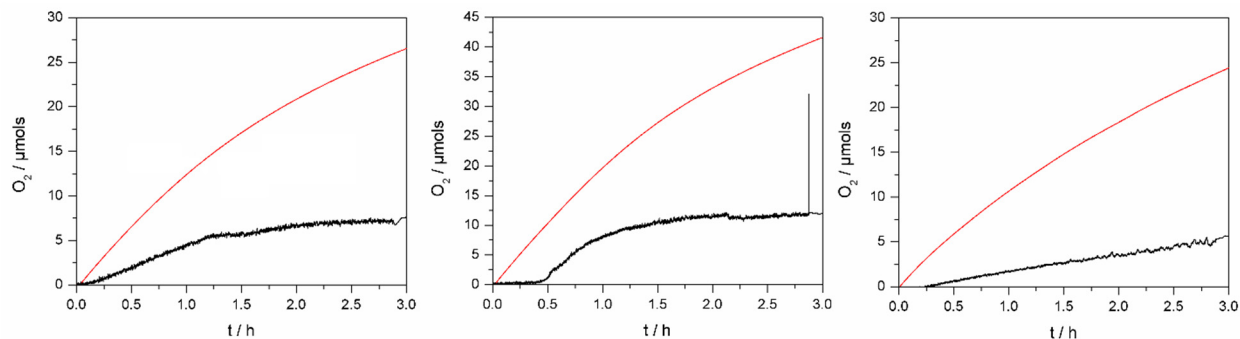

Fig. S10. Three trials of oxygen-evolution Faradaic efficiency measurements on WO<sub>3</sub> recorded at 1.43 V vs. RHE in 0.1 M KPi buffer at pH 4 under 200 mW/cm<sup>2</sup> AM1.5G illumination. The red lines represent the theoretical yield of O<sub>2</sub> based on the charge passed, and the black lines indicate the O<sub>2</sub> measured by the Neofix O<sub>2</sub> fluorescence probe. For each experiment, a fresh WO<sub>3</sub> electrode was employed. From left to right, the Faradaic efficiencies are 28.7, 28.8, and 23.1% respectively.

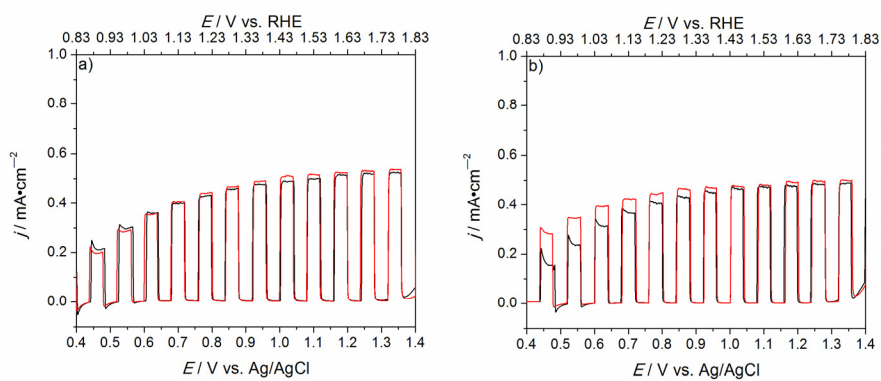

Fig. S11. CL-LSVs of a WO<sub>3</sub>-FeOOH electrode before (black) and after (red) having been soaked overnight in a) 0.1M pH 4 KPi and b) 0.1M pH 7 KPi solutions. CL-LSVs were collected in 0.1M pH 4 KPi under 1 sun illumination at 20 mV/s.

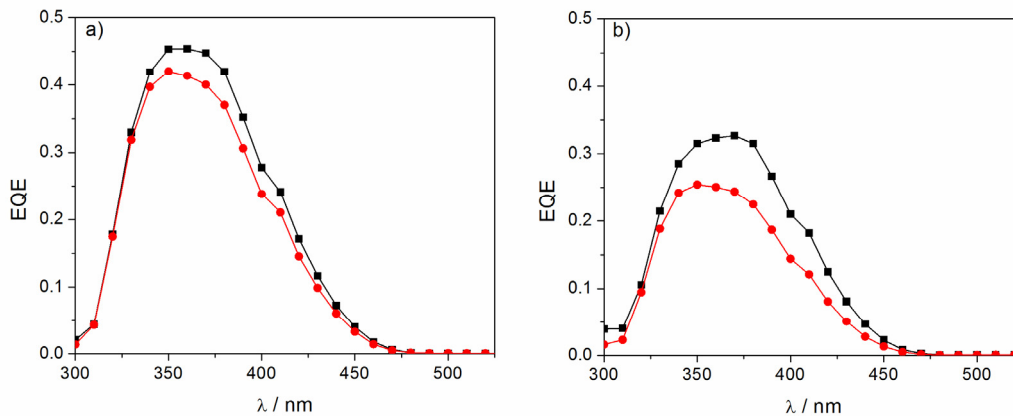

Fig. S12. EQE at different light chopping frequencies of a single WO<sub>3</sub> film before (a) and after (b) loading the FeOOH OEC. Black lines represent the EQE at 15Hz and red represent the EQE at 20 Hz.

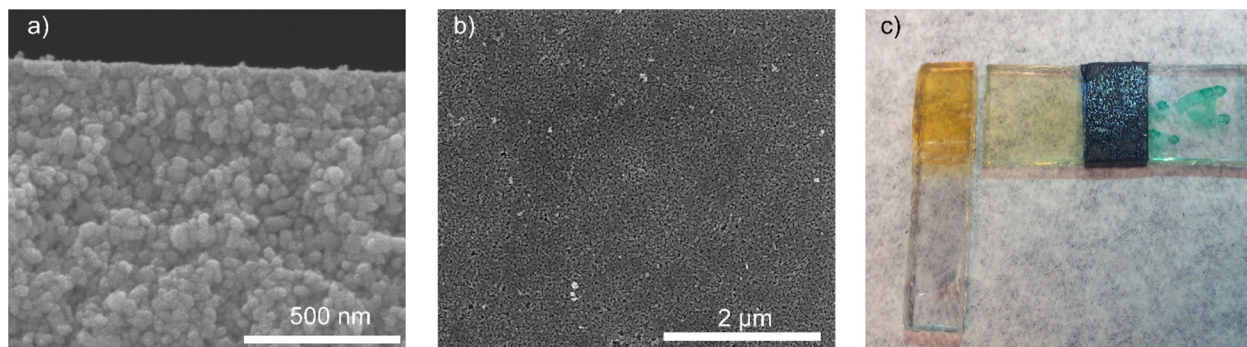

Fig. S13. 1) Cross-sectional SEM image of a  $\text{WO}_3\text{-FeOOH}$  electrode; b) top-down SEM image, and c) photograph of the electrode. For c), the electrode on the left is the sample used for SEM imaging and the electrode on the right is a  $\text{WO}_3$  film for comparison. No additional layer is visible in the cross-sectional SEM image, indicating that the  $\text{FeOOH}$  may grow primarily in the interstices of the film.

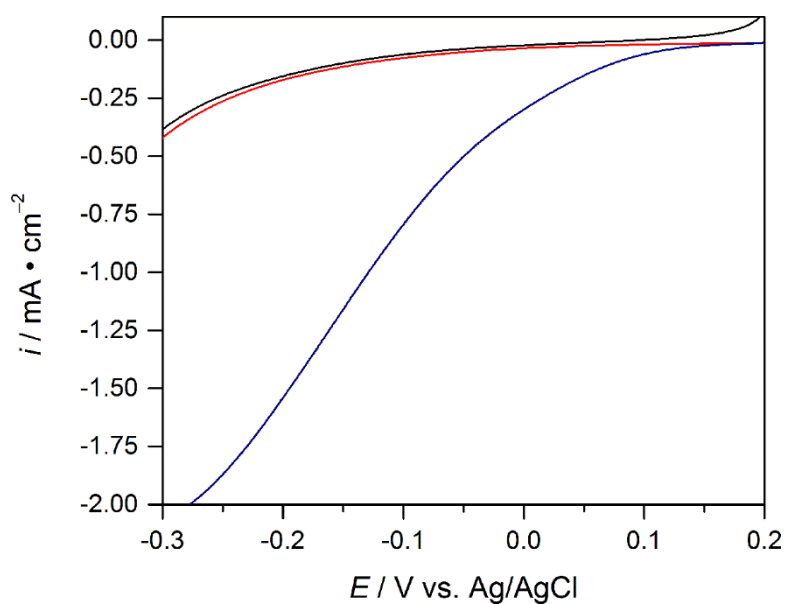

Fig. S14. Electrochemical detection of  $\text{H}_2\text{O}_2$  on  $\text{WO}_3$ . Cathodic LSV scans were recorded before (black) and after (red) CPC of a  $\text{WO}_3$  electrode under 1-sun AM1.5G illumination at 1.23 V vs. RHE for 2 hours in a 0.1 M  $\text{KPi}$  buffer at pH 4. The blue line represents the cathodic scan of a  $\text{WO}_3$  electrode in an identical solution that was spiked with 10  $\mu\text{L}$  of  $\text{H}_2\text{O}_2$ .

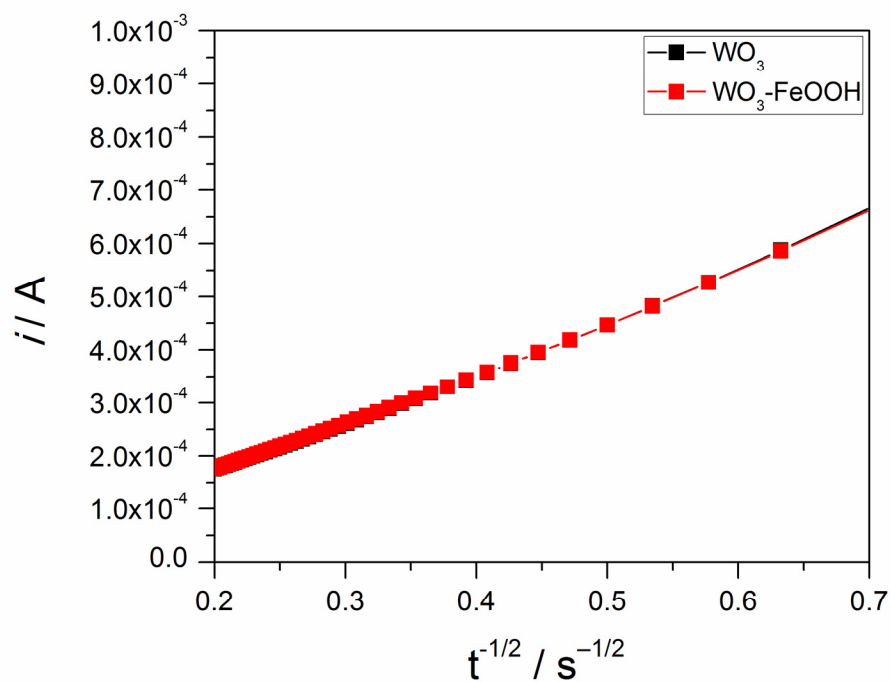

Fig. S15. Cottrell plot of the amperometric  $i-t$  curve.  $[Fe(CN)_6]^{3-}$  reduction was measured at  $-0.05$  V vs. Ag/AgCl in a 0.1 M KCl solution containing 6 mM  $K_3[Fe(CN)_6]$ . The Cottrell equation predicts a linear change in  $i$  vs.  $t^{-1/2}$  and the slope is proportional to the active surface area of the electrode.

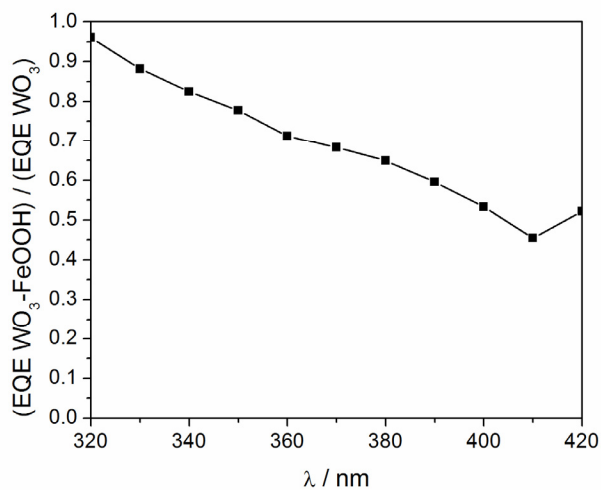

Fig. S16.  $(EQE\ WO_3) / (EQE\ WO_3-FeOOH)$ . This plot was constructed from the data represented in Fig. 7 of the manuscript by taking the EQE of  $WO_3-FeOOH$  and dividing it by the EQE of  $WO_3$ . A decrease in  $(EQE\ WO_3-FeOOH) / (EQE\ WO_3)$  is observed with increasing  $\lambda$  due to parasitic absorption from the FeOOH.
